# Supplementary material for: The coordination behaviour of large natural bite angle diphosphine ligands towards methyl and 4-cyanophenylpalladium(ii) complexes
Source: Royal Society of Chemistry journal article supplement (doi:10.1039/b111596k), 2002-01-01
Supplement: b111596k.doc [file b111596k.doc]

**The Coordination Behaviour of Large Natural Bite Angle Diphosphine Ligands towards Methyl and 4-Cyanophenylpalladium(II) Complexes**

Martin A. Zuideveld, Bert H. G. Swennenhuis, Maarten D. K. Boele, Yannick Guari, Gino P. F. van Strijdonck, Joost N. H. Reek, Paul C. J. Kamer, Kees Goubitz†, Jan Fraanje†, Martin Lutz‡, Anthony L. Spek‡ and Piet W. N. M. van Leeuwen*

*Institute of Molecular Chemistry, Universiteit van Amsterdam, Nieuwe Achtergracht 166, 1018 WV Amsterdam, The Netherlands.*

*E-mail address:* [pwnm@science.uva.nl](mailto:pwnm@science.uva.nl) (P.W.N.M. van Leeuwen).

† *Dept. Crystallography, Universiteit van Amsterdam, Nieuwe Achtergracht 166, 1018 WV Amsterdam, The Netherlands.*

‡ *Bijvoet Center for Biomolecular Research, Dept. Crystal and Structural Chemistry, Utrecht University, Padualaan 8, 3584 CH Utrecht, The Netherlands.*

**Experimental Section**

**General Synthetic Procedures** All reactions were carried out using standard Schlenk techniques under an atmosphere of purified argon or nitrogen. Benzene and toluene were distilled from sodium, diethylether was distilled from sodium/benzophenone and hexane and pentane were distilled from sodium/benzophenone/triglyme. Dichloromethane and acetonitrile were distilled from CaH2. Chemicals were purchased from Aldrich Chemical Co. and Acros Chimica. (COD)Pd(CH3)(Cl),1 (COD)Pd(CH3)(Br),1 (dppf)Pd(CH3)(Cl)1, Na[B(3,5-(CF3)2C6H3)],2 chloro-bis(diethylamino)phosphine,3 DPEphos,4 Thixantphos,4 Sixantphos,4 Xantphos,4 Thioxantphos,5 dtpf,6 dipf7 and depf8 were synthesised according to literature procedures. NMR spectra were recorded on a Bruker AMX 300, a Varian Mercury 300, and a Bruker DRX 300. 31P and 13C spectra were measured 1H decoupled (unless stated otherwise). Deuterated solvents were first degassed and then vacuum transferred from a drying agent. CD2Cl2 and CD3CN were distilled from CaH2. TMS was used as a standard for 1H and 13C NMR spectroscopy and H3PO4 for 31P NMR spectroscopy. Conductivities were measured in dry, degassed CH2Cl2 solutions (1.1-1.6 mM) using a Consort K720 Digital Conductometer. Mw determinations were performed on a Hewlett-Packard vapour pressure osmometer model 301A, using benzil as the reference compound. Elemental analyses were performed on a Hereaus Elementar Vario EL.

**Ligand synthesis**

**General remarks** All alkylphosphine ligands are very sensitive towards oxygen. Therefore, these ligands were synthesised and handled under an argon atmosphere. The products were purified by column chromatography under a nitrogen atmosphere.

**2,2’-Dilithiodiphenylether(*N,N,N',N'*-tetramethylethylenediamine).** To a solution of 7.18 g (42.2 mmol) of diphenylether and 14.0 mL (92.7 mmol) of TMEDA in 40 mL of hexane, 44.3 mL of a 2.1 M solution (93.0 mmol) of n-BuLi in hexane was added in 30 min. at 0 C. The reaction mixture stirred at room temperature for 16 hours. The dilithio-salt was precipitated at –20 C and filtered. The residue was washed with 20 mL of hexane. The off-white powder was isolated and used in synthesis without further analysis. Yield: 8.26 g (27.7 mmol, 65 %).

**2,2’-Bis-(di-*tert*-butylphosphino)diphenylether (DPEphos-*t*Bu, a-tBu).** 2.09 g (7.01 mmol) of 2,2’-dilithiodiphenylether was suspended in 40 mL of hexane. 2.66 mL (14.0 mmol) of chlorodi-*tert-*butylphosphine was added. The reaction mixture was stirred at room temperature for 60 hours and refluxed for four hours. The reaction mixture was quenched using 5 mL of degassed water and 5 mL of brine. The organic phase was dried over MgSO4. The solution was filtered and the solvent was removed *in vacuo*. The yellowish oil was purified by column chromatography (neutral alumina, eluent 7 : 3 mixture of diethyl ether and hexane). The solvents were removed *in vacuo* and a colourless viscous oil was isolated. Yield: 1.74 g (3.79 mmol, 54 %) of a colourless oil which solidifies upon standing. 1H NMR (300 MHz, CDCl3, 25 C): ** 7.79 (*Ph*, m, 2H), 7.24 (*Ph*, m, 2H), 7.05 (*Ph*, m, 2H), 6.73 (*Ph*, m, 2H), 1.24 (C(C*H*3)3, dd, 3*J*PH = 11.6 Hz, 44H). 31P NMR (121.5 MHz, CDCl3, 25 C):  13.0 ppm (s).

**2,2'-Bis-(di-*iso*-propylphosphino)diphenylether (DPEphos-*i*Pr, a-iPr).** The same procedure was followed as for DPEphos-*t*Bu (**a-tBu**). Chlorodi-*iso-*propylphosphine was used instead of chlorodi-*tert-*butylphosphine. Yield: 0.85 g (0.021 mmol, 37 %) colourless oil. 1H NMR (300 MHz, CDCl3, 25 C): ** 7.50 (*Ph*, m, 2H), 7.26 (*Ph*, m, 2H), 7.08 (*Ph*, t, 3*J*HH = 6.0 Hz, 2H), 6.74 (*Ph*, dd, 3*J*HH = 6.0 Hz, 3*J*PH = 3.0 Hz, 2H), 2.31 (C*H*(CH3)2, d, sept, 3*J*PH = 3.2 Hz, 3*J*HH = 7.0 Hz, 4H), 1.16 (CH(C*H*3)2, dd, 3*J*HH = 7.0 Hz, 3*J*PH = 14.5 Hz, 20H), 1.01 (CH(C*H*3)2, dd, 3*J*HH = 7.0 Hz, 3*J*PH = 12.6 Hz, 16H). 31P NMR (300 MHz, CDCl3, 25 C): ** 2.0 (s).

**9,9-Dimethyl-4,5-bis-(dichlorophosphino)xanthene.** 2.19 g (10.2 mmol) of 9,9-dimethylxanthene and 4.7 mL (31 mmol) of TMEDA were dissolved in 30 mL of hexane/diethyl ether (1 : 1, v/v). 14 mL of a 2.2 M (31 mmol) solution of n-BuLi in hexane was slowly added to the solution at 0 C. The reaction mixture was allowed to warm to room temperature and was stirred for 24 h. The reaction mixture was cooled to –78 C and 5.6 mL (30.7 mmol) of chloro-bis(diethylamino)phosphine was added. The reaction mixture was allowed to warm to room temperature and was stirred for another 24 h. The solvents were removed *in vacuo* and the dark oil was dissolved in 50 mL of hexane. The solution was filtered and the solvent was removed *in vacuo*. The brownish oil was dissolved again in 150 mL of hexane and a large excess of HCl gas was bubbled through the solution at -78 °C. The ammonium salt was removed by filtration of the reaction mixture and the crude product was recrystallised from hexane at –20 °C. Yield: 3.58 g (8.6 mmol, 84 %) of a yellow microcrystalline solid. 1H NMR (300 MHz, CDCl3, 25 C): ** 7.91 (*Ph*, d, 3*J*HH = 7.5 Hz, 2H), 7.60 (*Ph*, d, 3*J*HH = 7.5 Hz, 2H), 7.30 (*Ph*, t, 3*J*HH = 7.5 Hz, 2H), 1.63 (C(C*H*3)2, s, 4H). 31P NMR (121.5 MHz, CDCl3, 25 C): ** 159.0 (s).

**9,9-Dimethyl-4,5-bis-(dimethylphosphino)xanthene (Xantphos-Me, b-Me).** 1.40 g (3.40 mmol) of9,9-Dimethyl-4,5-bis-(dichlorophosphino)xanthene was dissolved in 30 mL of THF. To this solution 5.7 mL of a 3.0 M solution (17.0 mmol) of methylmagnesium bromide in THF was slowly added at –78 C. The reaction mixture was stirred for 0.5 h, after which it was allowed to warm to room temperature. The reaction mixture was stirred for 16 h. The solvent was removed *in vacuo* and the resulting oil was dissolved in hexane and 10 mL of degassed water was added. The organic layer was dried over MgSO4 and filtered over neutral alumina. The solvent was removed *in vacuo*. Yield: 0.61 g (1.85 mmol, 54 %) of a yellowish oil. 1H NMR (300 MHz, CDCl3, 25 C): ** 7.38 (*Ph*, m, 2H), 7.21-7.00 (*Ph*, m, 4H), 1.62 (C(C*H*3)2, s, 6H), 1.45 (P(C*H*3)2, m, 6H), 1.24 (P(C*H*3)2, s, 6H). 31P NMR (121.5 MHz, CDCl3, 25 C): ** -58.53 (s).

**Complex synthesis**

**(DPEphos)Pd(*4*-C6H4CN)Br** (**1a**) Yield : *ca.* 75 %. 1H NMR (300 MHz, CDCl3, 25 C): ** 6.8-7.6 (*Ph*, m, 32H). 31P NMR (121.5 MHz, CDCl3, 25 C): ** 14.8 (d, 2*J*PP = 26.7 Hz), 5.9 (d, 2*J*PP = 26.7 Hz). 13C NMR (75.4 MHz, CDCl3, 25 C): ** 170.2 (d, *J* = 124.7 Hz), 159.0, 137.1, 135.4, 133.1, 130.5, 129.6, 128.4, 128.3, 125.4, 123.6 (*Ph*, m) 120.8 (*C*N), 119.0 (*Ph*, m). Anal. Calcd. for (C43H32BrNOP2Pd): C, 62.45; H, 3.90; N, 1.69. Found: C, 61.86; H, 3.97; N, 1.64.

**(Xantphos)Pd(*4*-C6H4CN)Br** (**1b**). Yield: *ca.* 81 %. 1H NMR (300 MHz, CDCl3, 25 C): ** 7.64, 7.23, 6.75, 6.33 (*Ph*, m, 30H), 1.80 (*C*H3, br. m, 6H). 31P NMR (121.5 MHz, CDCl3, 25 C): ** 9.37 (s). 13C NMR (75.4 MHz, CDCl3, 25 C): ** 170.4, 155.6, 135.0, 132.0, 131.0 (t, *J* = 23.1 Hz), 130.2, 128.6, 128.3, 127.6, 124.7 (*Ph*, m), 121.6 (*Ph*, t, *J* = 22,1 Hz) 120.6 (*C*N), 104.0 (*Ph*, m), 36.4 (*C*(CH3)2), 28.7 (*C*H3). Molar conductivity: 4.2 S cm2 mol-1 Anal. Calcd. for C46H36BrNOP2Pd·0.58(CH2Cl2): C, 61.95; H, 3.92; N, 1.49. Found: C, 62.20; H, 4.18; N, 1.49.

**(Sixantphos)Pd(*4*-C6H4CN)Br** (**1c**). Yield: *ca.* 82 %. 1H NMR (300 MHz, CDCl3, 25 C): ** 7.80, 7.0-7.6, 6.45 (*Ph*, m, 30H), 0.61 (C*H*3, s, 6H). 31P NMR (121.5 MHz, CDCl3, 25 C): ** 11.1 (br, s). 13C NMR (75.4 MHz, CDCl3, 25 C): ** 170.4, 155.6, 135.0, 132.0 (*Ph*, m), 131.0 (*Ph*, t, *J* = 23.1 Hz), 130.2, 128.6, 128.3, 127.6, 124.7 (*Ph*, m), 121.6 (*Ph*, t, 2*J*PP = 22,1 Hz), 120.6 (*C*N), 104.0 (*Ph*, m), 36.4 (*C*(CH3)2), 28.7 (*C*H3). Molar conductivity: 6.0 S cm2 mol-1.

**(Thixantphos)Pd(*4*-C6H4CN)Br** (**1d**) Yield: *ca.* 68 %. 1H NMR (300 MHz, CDCl3, 25 C): ** 8.24 (*Ph*, br m, 4H), 7.6-6.2 (*Ph*, br m, 24H), 2.16 (C(H)C*H*3, s, 6H). 31P NMR (121.5 MHz, CDCl3, 25 C): ** 11.7 (s).

(**1e**) Yield: *ca*. 72 %. 1H NMR (300 MHz, CDCl3, 25 C): 8.1-6.7 (*Ph*, m, 30H), 2.17 (C(C*H*3)2, s, 3H), 1.65 (C(C*H*3)2, s, 3H) 31P NMR (121.5 MHz, CDCl3, 25 C): 37.0 (s).

**(DPEphos)Pd(CH3)Cl (2a).** Yield: *ca.* 85 %. 1H NMR (300 MHz, CD2Cl2, 25 °C): ** 7.8-6.8 (*Ph*, m, 25H), 6.5-6.2 (*Ph*, m, 3H), 0.92 (PdC*H*3, dd, 3*J*PH = 6.3 Hz and 3*J*PH = 4.5 Hz). 31P NMR (121.5 MHz, CD2Cl2, 25 °C): ** 30.6 (d, 2*J*PP = 29.9 Hz), 8.6 (d, 2*J*PP = 29.9 Hz). Molar conductivity: 2.6 S cm2 mol-1. Anal. Calcd. for (C37H31ClOP2Pd): C, 63.90; H, 4.50. Found: C, 64.25; H, 4.68.

**(2,2’-Bis-(di-*tert*-butylphosphino)diphenylether)Pd(CH3)Cl (2a-tBu).** Yield: *ca*. 87 %. 1H NMR (300 MHz, CDCl3, 25 °C): ** 8.00 (*Ph*, m, 2H), 7.72 (*Ph*, t, 3*J*HH = 7.5 Hz, 2H), 7.44 (*Ph*, m, 4H), 1.50 (C(C*H*3)3, dd, 3*J*PH = 7.5 Hz, 36H), 1.44 (PdC*H*3, t, 3*J*PH = 5.1 Hz, 3H). 31P NMR (121.5 MHz, CDCl3, 25 °C): ** 48.3 (s). Molar conductivity: 79.9 S cm2 mol-1.

**(2,2'-Bis-(di-*iso*-propylphosphino)diphenylether)Pd(CH3)Cl (2a-iPr).** Yield: *ca*. 75 %. 1H NMR (300 MHz, CDCl3, 25 C): ** 7.7-6.8 (*Ph*, m, 8H), 3.12 (C*H*(CH3)2, br s, 4H),1.4-1.0 (CH(C*H*3)2, br m*,* 24H), 0.16 (br m, 3H, PdC*H*3). 31P NMR (121.5 MHz, CDCl3, 25 C): ** 54.62 (br s). Molar conductivity: 14.9 S cm2 mol-1. Anal. Calcd. for (C25H39ClOP2Pd): C 53.68; H, 7.03. Found: C, 55.61; H, 7.38. (Large deviation may be caused by hygroscopic character of the complex.)

**(Xantphos)Pd(CH3)Cl (2b).** Yield: *ca.* 78 %. 1H NMR (300 MHz, CD2Cl2, 25 °C): ** 7.7-7.1 (*Ph*, m, 26H), 1.76 (C(C*H*3)2, s, 6H), 0.38 (PdC*H*3, s, 3H). 31P NMR (CD2Cl2, 25 °C): ** 15.8 (br,s). 1H NMR (300 MHz, CD2Cl2, -70 °C): ** 8.3-6.6 (*Ph*, m, 26H), 2.0-1.4 (C(C*H*3)2, br, s, 6H), 0.53 (PdC*H*3 (*cis*-complex), dd, 3*J*PH = 7.2 Hz and 3*J*PH = 3.6 Hz, 3H), -0.16 (PdC*H*3 (*trans*-complex), t, 3*J*PH = 6.0 Hz, 3H). 31P NMR (121.5 MHz, CD2Cl2, -70 °C): 27.6 (*cis*-complex, d, 2*J*PP = 31.7 Hz), 12.0 (*trans*-complex, s), 11.2 (*cis*-complex, d, 2*J*PP = 31.6 Hz). Molar conductivity: 3.5 S cm2 mol-1. Anal. Calcd. for (C40H35ClOP2Pd): C, 65.32; H, 4.80. Found: C, 65.20; H, 5.19.

**(Xantphos-Me)Pd(CH3)Cl (2b-Me).** Yield: *ca*. 64 %. White solid. 1H NMR (300 MHz, CDCl3, 25 ): ** 7.49 (*Ph*, dd, *J* = 6.6 Hz and *J* = 2.1 Hz, 1H)*,* 7.43 (*Ph*, dd, *J* = 7.2 Hz and *J* = 1.5 Hz,1H), 7.23 (*Ph*, m, 2H), 7.19(*Ph*, m, 2H), 1.88 (P(C*H*3)2, d, 3*J*PH = 9.9 Hz, 6H), 1.81 (P(C*H*3)2,d, 3*J*PH = 7.2 Hz, 6H), 1.63 (C(C*H*3)2,s, 6H), 0.66 (PdC*H*3, dd, 3*J*PH  = 4.6 Hz and 3*J*PH  = 7.7 Hz, 3H). 31P NMR (121.5 MHz, CDCl3, 25 C): ** -29.0 (d, 2*J*PP = 34.3 Hz), -13.5 (d, 2*J*PP = 34.3 Hz). Anal. Calcd. for (C20H27ClOP2Pd): C 49.30; H, 5.59. Found: C, 50.09; H, 5.72.

**(Sixantphos)Pd(CH3)Cl (2c).** Yield: *ca.* 86 %. 1H NMR (300 MHz, CD2Cl2, -40 °C): ** 7.9-6.7 (*Ph*, m, 26H), 1.66 (PdC*H*3, dd, 3*J*PH = 7.0 Hz and 3.8 Hz, 3H), 0.47 (Si(C*H*3)2, s, 6H). 31P NMR (121.5 MHz, CD2Cl2, -40 °C): ** 30.6 (d, 2*J*PP = 33.9 Hz), 14.2 (d, 2*J*PP = 33.9 Hz). Anal. Calcd. for (C39H35ClOP2SiPd): C, 62.32; H, 4.69. Found: C, 62.58; H, 4.42.

**(Thixantphos)Pd(CH3)Cl (2d).** Yield: *ca.* 65 %. 1H NMR (300 MHz, CD2Cl2, -60 °C): ** 8.3-6.5 (*Ph*, m, H), 2.20 and 2.17 (C(C*H*3), s, 6H), 0.74 (PdC*H*3 (*cis*-complex), dd, 3*J*PH = 7.2 Hz and 3*J*PH = 2.7 Hz, 3H), -0.21 (PdC*H*3 (*trans*-complex), t, 3*J*PH = 6.0 Hz, 3H). 31P NMR (CD2Cl2, -60 °C): ** 32.0 (*cis*-complex, d, 2*J*PP = 34.0 Hz), 15.9 (*trans*-complex, s), 15.5 (*cis*-complex, d, 2*J*PP = 34.1 Hz). Anal. Calcd. for (C39H33ClOP2SPd): C, 62.16; S, 4.25; H, 4.41. Found: C, 61.68; S, 4.66; H, 4.39.

**(Thioxantphos)Pd(CH3)Cl (2e).** Yield: *ca*. 57 %. 1H NMR (300 MHz, CDCl3, 25 °C): ** 7.9-7.2 (*Ph*, m, 26H), 2.15 (C(C*H*3)3, s, 3H), 1.63 (C(C*H*3)3, s, 3H), 1.08 (PdC*H*3, t, 3*J*PH = 8.5 Hz, 3H). 31P NMR (121.5 MHz, CDCl3, 25 °C): ** 40.5 (s). 13C NMR (75.4 MHz, CD2Cl2, 25 C): ** 147.5, 139.7 and 137-128 (*Ph*, m), 45.1 (*C*(CH3)2, s), 27.0, 26.8 (C(*C*H3)2, s), 8.9 (Pd*C*H3, s).

**[(dtpf)PdCH3]+ Cl- (2f-tBu).** Yield: *ca*. 92 %. 1H NMR (300 MHz, CDCl3, 25 C): ** 5.45 (*Cp*, m, 4H), 4.20 (*Cp*, m, 4H), 1.69 (PdC*H*3, m, 3H), 1.47 (C(CH3)3, dd, 3*J*PH = 7.4 Hz, 36H). 31P NMR (121.5 MHz, CDCl3, 25 C): ** 29.4 (s). Molar conductivity: 96.5 S cm2 mol-1. Anal. Calcd. for (C27H39ClFeP2Pd): C, 52.03; H, 6.31. Found: C, 51.84; H, 6.12.

**(dipf)Pd(CH3)Cl (2f-iPr).** Yield: *ca*. 83 %. 1H NMR (300 MHz, CDCl3, 25 C): ** 4.4-4.3 (*Cp,* m, 8H,), 2.69 and 2.43 (C*H*(CH3)2, m, 3*J*HH = 7.1 Hz, 4H), 1.50 (dd, 6H, 3*J*HH = 7.1 Hz and 3*J*PH = 15.9 Hz, CH(*CH3*)2), 1.29-1.13 (CH(C*H*3)2,m, 18H), 0.91 (PdC*H*3, dd, 3*J*PH = 3.0 Hz and 3*J*PH = 6.9 Hz, 3H). 31P NMR (121.5 MHz, CDCl3, 25 C): ** 49.5 (d, 2*J*PP = 21.6 Hz), 29.5 (d, 2*J*PP = 21.6 Hz). Molar conductivity: 2.0 S cm2 mol-1.Anal. Calcd. for (C23H39ClFeP2Pd): C, 48.03; H, 6.83. Found: C, 48.21; H, 6.98.

**Synthesis of (L-L)Pd(CH3)Br (3).** To a solution of 0.36 mmol (COD)Pd(CH3)Br in 5 mL of benzene, 0.37 mmol (1.05 equiv.) of ligand (L-L) was added. The solution was stirred for one hour. The suspension was filtered and the residue was washed with benzene and diethylether. The product was dried *in vacuo*.

**(DPEphos)Pd(CH3)Br (3a).** Yield: *ca.* 89 %. 1H NMR (CD2Cl2, 25 °C): ** 7.8-6.9 (*Ph*, m, 25H), 6.5-6.3 (*Ph*, m, 3H), 1.00 (PdC*H*3, d, 3*J*PH = 2.1 Hz). 31P NMR (CD2Cl2, 25 °C): ** 30.8 (d, 2*J*PP = 30.0 Hz), 8.9 (d, 2*J*PP = 30.0 Hz). Anal. Calcd. for (C37H31BrOP2Pd): C, 60.06; H, 4.22. Found: C, 60.00; H, 4.21.

**(Xantphos)Pd(CH3)Br (3b).** Yield: *ca.* 65 %. 1H NMR (300 MHz, CD2Cl2, -80 °C): ** 8.2-6.5 (*Ph*, m, 26H), 2.1-1.5 (C(C*H*3)2, br, s, 6H), 0.56 (PdC*H*3 (*cis*-complex), dd, 3*J*PH = 7.2 Hz and 3*J*PH = 3.6 Hz, 3H), -0.09 (PdC*H*3 (*trans*-complex), t, 3*J*PH = 6.0 Hz, 3H). 31P NMR (121.5 MHz, CD2Cl2, -80 °C): ** 29.6 (*cis*-complex, d, 2*J*PP = 31.4 Hz), 15.3 (*trans*-complex, s), 12.3 (*cis*-complex, d, 2*J*PP = 31.4 Hz). Molar conductivity: 4.6 S cm2 mol-1.

**[(DPEphos)Pd(*4*-C6H4CN)(CH3CN)]+ [CF3SO3]-** (**4a**). *In situ* 31P NMR (121.5 MHz, CDCl3, 25 C): ** 18.1 (d), 7.6 (d).

**[(Xantphos)Pd(*4*-C6H4CN)]+ [CF3SO3]-** (**4b**) Yield: *ca.* 66 %. 1H NMR (300 MHz, CDCl3, 25 C): ** 7.84, 7.6-7.4, 7.08 (*Ph*, m, 30H), 1.84 (C*H*3, br. s, 6H). 31P NMR (121.5 MHz, CDCl3, 25 C): ** 18.2 (s). 13C NMR (75.4 MHz, CDCl3, 25 C): ** 152.4 (*Ph*, d, *J* = 125.4 Hz), 135.2, 134.7 (*Ph*, m), 133.8 (*Ph*, t, *J* = 6.6 Hz), 133.2, 132.8, 130.0, 128.0 (*Ph*, m), 126.5 (*Ph*, t, *J* = 26.4 Hz), 119.5 (*C*N), 119.0 (*Ph*, t, *J* = 19.7 Hz), 108.3 (*Ph*, m), 35.2 (*C*(CH3)2), 33.8 (*C*H3). Molar conductivity: 79.8 S cm2 mol-1. Anal. Calcd. for C47H36F3NO4P2SPd: C, 60.30; H, 3.88; N, 1.50; S, 3.42. Found: C, 59.87; H, 3.89; N, 1.45; S, 3.89.

**[(Sixantphos)Pd(*4*-C6H4CN)]+ [CF3SO3]-** (**4c**). Yield: *ca.* 70 %. 1H NMR (300 MHz, CDCl3, 25 C): ** 7.90, 7.6-7.3, 7.02 (*Ph*, m, 30H), 0.63 (C*H*3, s, 6H). 31P NMR (121.5 MHz, CDCl3, 25 C): ** 17.4 (s).

**[(Thixantphos)Pd(*4*-C6H4CN)]+ [CF3SO3]-** (**4d**). Yield: *ca.* 68 %. 1H NMR (300 MHz, CDCl3, 25 C): ** 7.6-6.9 (*Ph*, m, 28H), 2.24 (C(H)C*H*3, s, 6H). 31P NMR (121.5 MHz, CDCl3, 25 C): ** 17.8 (s).

**[(Thioxantphos)Pd(*4*-C6H4CN)]+ [CF3SO3]-** (**4e**). Yield: *ca.* 72 %. 1H NMR (300 MHz, CDCl3, 25 C): ** 8.2-6.8 (*Ph*, m, 30H), 2.22 (C(C*H*3)2, s, 6H). 31P NMR (121.5 MHz, CDCl3, 25 C): ** 37.2 (s).

**Synthesis of ionic methylpalladium complexes (5 and 6).** 0.190 mmol **2** was suspended in 2 mL of CH2Cl2 / CH3CN (10 : 1, v/v). 0.191 mmol of AgX (X = CF3SO3, CF3CO2) was added to the suspension. After stirring for 10 minutes, the suspension was filtered over celite. Then 10 mL diethylether was added to crystallise the product.

**[(DPEphos)PdCH3(CH3CN)]+ [CF3SO3]- (5a).**Yield: *ca*. 65 %. 1H NMR (300 MHz, CDCl3, -20 C): ** 7.8-6.2, (*Ph*, m, 28H), 1.79 (C*H*3CN, s, 3H), 0.88 (PdC*H*3, dd, 3*J*PH = 6.6 Hz and 3*J*PH = 2.9 Hz, 3H). 31P NMR (121.5 MHz, CDCl3, -20 C): ** 31.8 (d, 2*J*PP = 31.7 Hz), 7.7 (d, 2*J*PP = 31.7 Hz). 13C NMR (75.4 MHz, CD2Cl2, -20 C): ** 159.0, 157.6, 137-120 (*Ph*, m), 118.3 (CH3*C*N, s), 2.3 (Pd*C*H3, s), -3.5 (*C*H3CN, s). Molar conductivity: 71.5 S cm2 mol-1. Anal. Calcd. for (C40H34F3O4P2SNPd): C, 56.51; H, 4.03; N, 1.65. Found: C, 56.16; H, 4.05; N, 1.57.

**[(2,2’-Bis-(di-*tert*-butylphosphino)diphenylether)PdCH3]+ [CF3SO3]- (5a-tBu).** Yield: *ca*. 84 %. 1H NMR (300 MHz, CDCl3, 25 C): ** 8.0-7.4 (*Ph*, m, 8H), 1.49 (C(C*H*3)3, dd, 3*J*PH = 7.6 Hz, 36H), 1.44(PdC*H*3, t, 3*J*PH = 4.9 Hz). 31P NMR (121.5 MHz, CDCl3, 25 C): ** 48.4 (s). Molar conductivity: 83.8 S cm2 mol-1. Anal. Calcd. for (C30H47F3O4P2PdS): C, 49.42; H, 6.50. Found: C, 49.02; H, 6.60.

**[(2,2'-Bis-(di-*iso*-propylphosphino)diphenylether)PdCH3]+ [CF3SO3]- (5a-iPr).** Yield:*ca*. 56 %.1H NMR (300 MHz, CDCl3, 25 C): ** 7.73 (*Ph*, dd, 3*J*PH = 3.6 Hz, 3*J*HH = 7.4 Hz, 2H), 7.64 (*Ph*, d, 3*J*HH = 7.9 Hz, 2H), 7.49 (*Ph*, d, 3*J*HH = 7.9 Hz, 2H), 7.42 (*Ph*, t, 3*J*HH = 7.4 Hz, 2H), 2.71 (C*H*(CH3)2, br m*,* 3*J*HH = 6.9 Hz, 4H)*,* 1.4-1.2 (CH(C*H*3)2 en PdC*H*3, m*,* 27H). 31P NMR (121.5 MHz, CDCl3, 25 C): ** 35.8 (s). Molar conductivity: 80.5 S cm2 mol-1. Anal. Calcd. for (C26H39F3O4P2SPd): C, 46.40; S, 4.76; H, 5.84. Found: C, 46.02; S, 4.81; H, 5.79.

**[(Xantphos)PdCH3]+ [CF3SO3]- (5b).** Yield: *ca*. 78 %. 1H NMR (300 MHz, CDCl3, 25 C): ** 7.9-7.4 (*Ph*, m, 26), 1.75 (C(C*H*3)2, s, 6H), 1.50 (PdC*H*3, t, 3*J*PH = 5.7 Hz). 31P NMR (121.5 MHz, CDCl3, 25 C): ** 20.4 (s). Anal. Calcd. for (C41H35O4P2SF3Pd): C, 58.00; S, 3.78; H, 4.15. Found: C, 57.94; S, 3.63; H, 4.30.

**[(Xantphos-Me)PdCH3]+ [CF3SO3]- (5b-Me).** Yield: *ca*. 45 %. 1H NMR (300 MHz, CDCl3, 25 C): ** 7.8-7.6 (*Ph*, m, 4H), 7.43 (*Ph*, t, 3*J*HH = 7.8 Hz, 2H), 1.82 (P(C*H*3)2, s, 12H), 1.68 (C(C*H*3)2, s, 6H), 1.21 (PdC*H*3, t, 3*J*PH = 6.6 Hz, 3H). 31P NMR (121.5 MHz, CDCl3, 25 C): ** -5.0 (s).

**[(Sixantphos)PdCH3]+ [CF3SO3]- (5c).** Yield: *ca*. 45 %. 1H NMR (300 MHz, CDCl3, 25 C): ** 7.9-7.5 (*Ph*, m, 26H), 1.51 (PdC*H*3, t, 3*J*PH = 5.7 Hz), 0.58 (Si(C*H*3)2, s, 6H). 31P NMR (121.5 MHz, CDCl3, 25 C): ** 20.2 (s).

**[(Thixantphos)PdCH3]+ [CF3SO3]- (5d).** Yield: *ca*. 65 %. 1H NMR (300 MHz, CDCl3, -20 C): ** 7.7-7.4 (*Ph*, m, 20H), 7.16, 7.00 (*Ph*, s, 2H), 2.25 (CC*H*3, s, 6H), 1.44 (PdC*H*3, t, 3*J*PH = 5.4 Hz, 3H). 31P NMR (121.5 MHz, CDCl3, -20 C): ** 20.4 (s).

**[(dtpf)PdCH3]+ [CF3SO3]- (5f-tBu).** Yield: *ca*. 85 %. 1H NMR (300 MHz, CDCl3, 25 C): ** 5.25 (*Cp*, m, 4H), 4.20 (*Cp*, m, 4H), 1.70 (PdC*H*3, t, 3*J*PH = 4.8 Hz, 3H), 1.46 (C(C*H*3)3, dd, 3*J*PH = 7.5 Hz, 36H). 31P NMR (121.5 MHz, CDCl3, 25 C): ** 29.3 (s). Molar conductivity: 76.7 S cm2 mol-1. Anal. Calcd. for (C28H47F3FeO3P2SPd): C, 45.15; S, 4.30; H, 6.36. Found: C, 45.14; S, 4.32; H, 6.47.

**[(dipf)PdCH3(CH3CN)]+ [CF3SO3]- (5f-iPr).** Yield: *ca*. 56 %. 1H NMR (300 MHz, CDCl3, -40 C): ** 4.49, 4.48, 4.41, 4.35 (*Cp*, s, 8H), 2.58 (C*H*3CN, s, 3H), 2.43, 2.31 (C*H*(CH3)2, q, 3*J*HH = 6.9 Hz, 2H), 2.06 (C*H*(CH3)2, br s, 2H), 1.36-1.06 (CH(C*H3*)2, dd, 3*J*HH = 6.9 Hz and 3*J*PH = 14 Hz, 24H), 0.73 (PdC*H*3, br d, 3*J*PH = 4.8 Hz, 3H). 31P NMR (121.5 MHz, CDCl3, -40 C): ** 54.1 (d, 2*J*PP = 21.3 Hz), 32.7 (d, 2*J*PP = 21.3 Hz). Molar conductivity: 38.0 S cm2 mol-1. Anal. Calcd. For (C26H42F3FeNO3P2SPd): C, 42.78; S, 4.39; N, 1.92; H, 5.84; Found: C, 42.72; S, 4.11; N, 1.78; H, 5.97.

**(DPEphos)PdCH3(CF3CO2) (6a).** Yield: *ca*. 87 %. 1H NMR (300 MHz, CDCl3, 25 C): ** 7.8-6.2 (*Ph*, m, 28H), 0.87 (PdC*H*3, dd, 3*J*PH = 6.9 Hz and 3*J*PH = 2.4 Hz). 31P NMR (121.5 MHz, CDCl3, 25 C): ** 32.1 (d, 2*J*PP = 28.7 Hz), 9.1 (d, 2*J*PP = 28.7 Hz). 13C NMR (75.4 MHz, CDCl3, 25 C): ** 160.2 (CF3*C*O2, q, 2*J*CF = 36.2 Hz), 159.1, 138-117 (*Ph*, m), 116.0 (*C*F3CO2, q, 1*J*CF = 292 Hz), 15.1 (Pd*C*H3, dd, 2*J*PC = 83.8 Hz and 2*J*PC = 2.7 Hz). Molar conductivity: 3.1 S cm2 mol-1. Anal. Calcd. for (C39H31F3O3P2Pd): C, 60.60; H, 4.05. Found: C, 60.31; H, 4.03.

**[(dtpf)PdCH3]+ [CF3CO2]- (6f-tBu).** Yield: *ca*. 72 %. 1H NMR (300 MHz, CDCl3, 25 C): ** 5.25 (*Cp*, s*,* 4H), 4.17 (*Cp*, s, 4H), 1.68 (PdC*H*3, t, 3*J*PH = 4.5 Hz, 3H), 1.44 (C(C*H*3)3, m, 36H). 31P NMR (121.5 MHz, CDCl3, 25 C): ** 29.1 (s). Molar conductivity: 44.6 S cm2 mol-1.Anal. Calcd. for (C29H47F3FeO2P2Pd): C, 43.49; H, 4.42. Found: C, 39.42; H, 3.99. (Large deviation may be caused by hygroscopic character of the complex.)

**(dipf)PdCH3(CF3CO2) (6f-iPr).** Yield: *ca*. 73 %. 1H NMR (300MHz, CDCl3, 25 C): ** 4.40-4.35 (C*H*, m, 8H), 2.38, 2.35, 2.20, 2.18 (C*H*(CH3)2, m, 4H), 1.38, 1.27, 1.21, 1.17 (CH(C*H*3)2, dd, 3*J*HH = 7.0 Hz, 3*J*PH = 15.3 Hz, 24H), 0.81 (PdC*H*3, dd, 3*J*PH = 2.0 Hz and 3*J*PH = 6.8 Hz, 3H). 31P NMR (121.5 MHz, CDCl3, 25 C): ** 47.35 (d, 2*J*PP = 22.1 Hz), 25.8 (d, 2*J*PP = 22.1 Hz). Molar conductivity: 3.0 S cm2 mol-1. Anal. Calcd. for (C25H39F3FeO2P2Pd): C, 46.00; H, 6.02. Found: C, 45.34; H, 6.04.

**Synthesis of [(depf)Pd(CH3)Cl]2 (7).** To a solution of 0.36 mmol (COD)Pd(CH3)Cl in 5 mL of benzene, 0.37 mmol (1.05 equiv.) of ligand (L-L) was added. The solution was stirred for one hour. The suspension was filtered and the residue was washed with benzene and diethylether. The product was dried *in vacuo*. Yield: *ca*. 80 %. 1H NMR (300 MHz, CDCl3, 25 C): ** 5.19 (*Cp*, s, 4H), 4.34 (*Cp*, d, 4H), 2.39 (C*H*2CH3, br s, 2H), 2.08 (C*H*2CH3, br s, 4H), 1.80 (C*H*2CH3, br s, 2H), 1.24 (CH2C*H*3, br s, 6H), 1.01 (CH2C*H*3, br s, 6H), 0.51 (PdC*H*3, t, 3*J*PH = 5.9 Hz, 3H). 31P NMR (121.5 MHz, CDCl3, 25 C): ** 9.0 (s). Molar conductivity: 12.2 S cm2 mol-1. Anal. Calcd. for (C19H31ClFeP2Pd): C 43.96; H, 6.02; Found: C, 43.54; H, 6.01.

**Synthesis of (depf)Pd(CH3)Cl (8).** An NMR tube was filled with 15 mg of **7** and 0.7 mL of CDCl3. The solution was allowed to stand at room temperature for one day. Complete conversion of **7** was observed.1H NMR (300 MHz, CDCl3, 25 C): ** 4.37, 4.35, 4.34, 4.30 (*Cp*, s, 8H), 2.1-1.8 (C*H*2, m, 8H), 1.3-1.1 (C*H*3, m, 12H), 0.75 (PdC*H*3, dd, 3*J*PH = 7.5 Hz, 3*J*PH = 3.6 Hz, 3H). 31P NMR (121.5 MHz, CDCl3, 25 C): ** 30.1 (d, 2*J*PP = 28.2 Hz), 10.7 (d, 2*J*PP = 28.2 Hz).

**References**

(1) Dekker, G. P. C. M.; Elsevier, C. J.; Vrieze, K.; van Leeuwen, P. W. N. M. *Organometallics* 1992, **11**, 1598-1603.

(2) Brookhart, M.; Grant, B.; Volpe Jr, A. F. *Organometallics* 1992, **11**, 3920-3922.

(3) Nöth, H.; Vetter, H.-J. *Chem. Ber.* 1963, **96**, 116.

(4) Kranenburg, M.; van der Burgt, Y. E. M.; Kamer, P. C. J.; van Leeuwen, P. W. N. M.; Goubitz, K.; Fraanje, J. *Organometallics* 1995, **14**, 3081.

(5) van der Veen, L. A.; Keeven, P. H.; Schoemaker, G. C.; Reek, J. N. H.; Kamer, P. C. J.; van Leeuwen, P. W. N. M.; Lutz, M.; Spek, A. L. *Organometallics* 2000, **19**, 872-883.

(6) Cullen, W. R.; Kim, T.-J. *Organometallics* 1983, **2**, 714-719.

(7) Butler, I. R.; Cullen, W. R.; Kim, T.-J. *Synth. React. Inorg. Met.-Org. Chem.* 1985, **15**, 109-116.

(8)Rautenstrauch, V.; Vanhessche, K. P. M.; Genet, J.-P.; Lenoir, J.-Y. *Ruthenium catalysts and their use in the asymmetric hydrogenation of cyclopentones*; Firmenich S.A.: Switzerland, 1999, pp 28.
